# Supplementary material
Source: MDPI journal article supplement (https://www.mdpi.com/2072-4292/14/8/1899)
Supplement: s1 [file s1]

Archive with 2 entries (2 files):
- remotesensing-1598935-supplementary.pdf
- remotesensing-1598935-supplementary.xlsx
