# Supplementary material
Source: MDPI journal article supplement (https://www.mdpi.com/2072-4292/14/8/1899)
Supplement: s1 [file s1 › remotesensing-1598935-supplementary.pdf]

remote sensing-1598935-supplementary

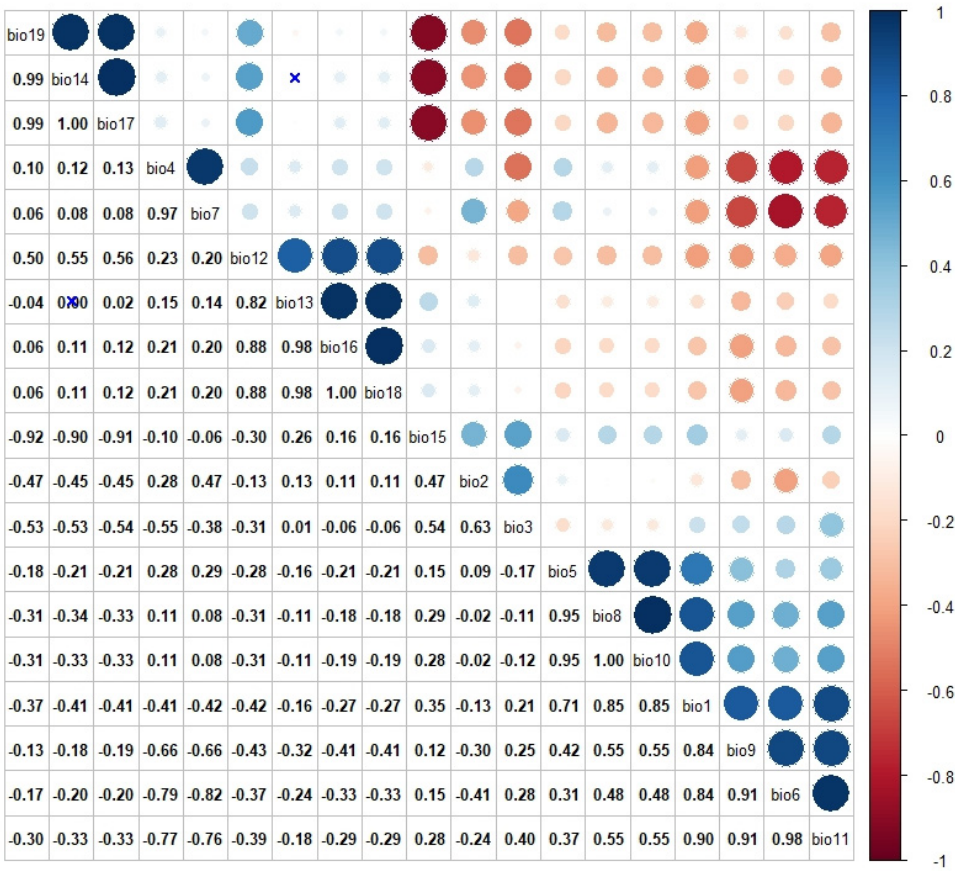

**Figure S1.** Pearson correlation coefficient of bioclimatic factors. The blue cross indicates the difference is not significant ( $p > 0.05$ ); all remaining differences were significant ( $p < 0.001$ ).

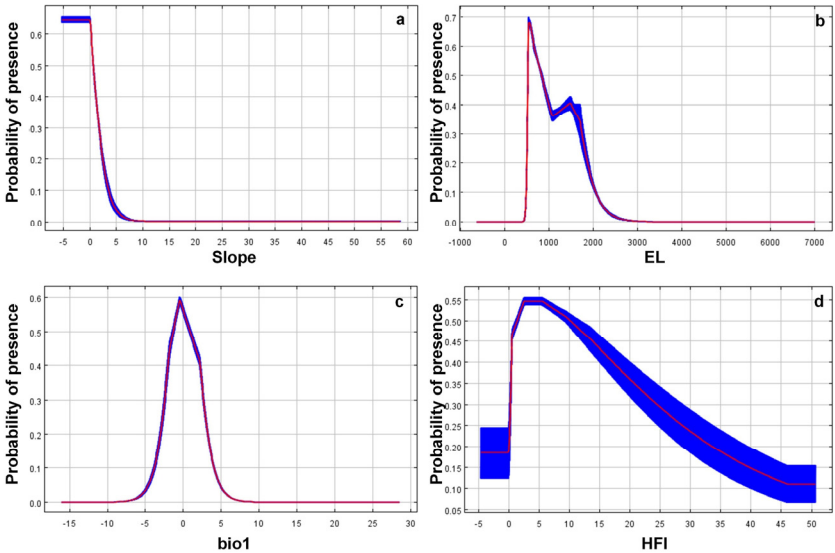

**Figure S2.** The response curve of distribution probability of Swan Geese in breeding grounds.

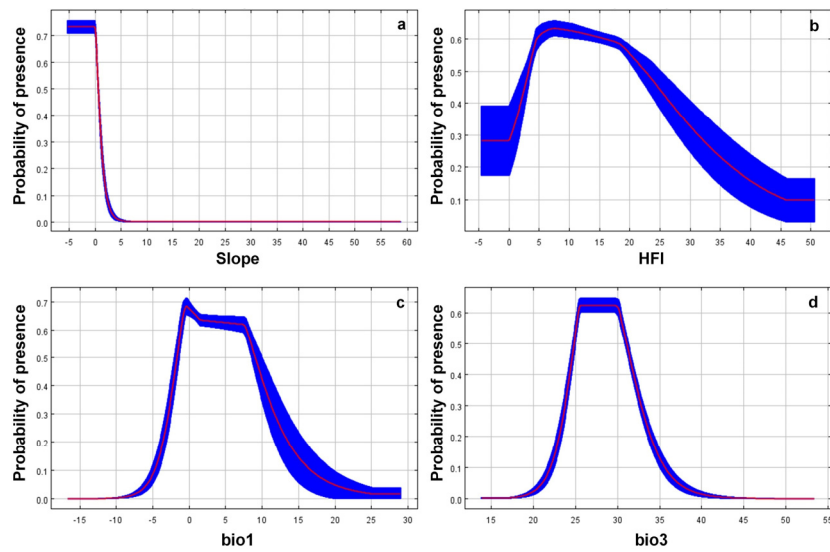

**Figure S3.** The response curve of distribution probability of Swan Geese in stopover sites.

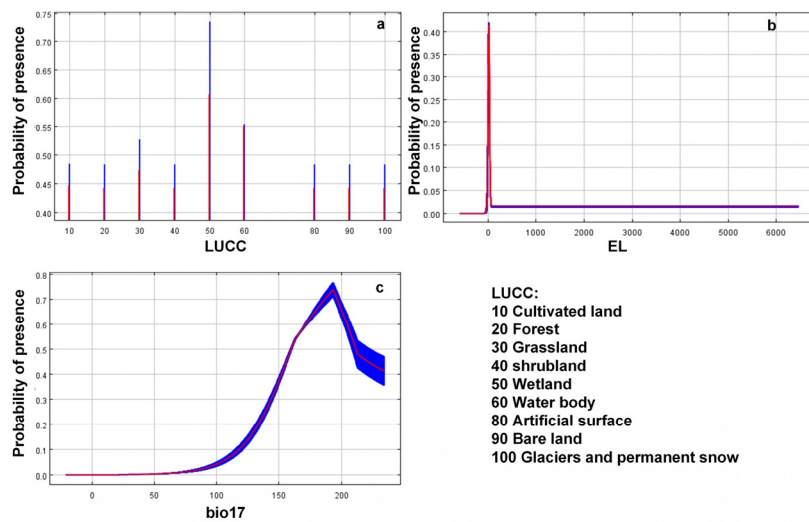

**Figure S4.** The response curve of distribution probability of Swan Geese in wintering grounds
