# Supplementary material
Source: MDPI journal article supplement (https://www.mdpi.com/2072-4292/14/8/1899)
Supplement: s1 [file s1 › remotesensing-1598935-supplementary.xlsx]

## Sheet: remotesensing-1598935-TableS1
Table S1. The amount of data processed by GPS satellite tracking data
Species	Latin name	ID	Original data			filter: Data pre-processing	Behavioural annotation of movement trajectories		filter: Identify typical representative points (95% home range)	Dividing swan geese migration stages by date							filter: Eliminate bias of clustered occurrences
			Start time	End time	the number of GPS sites					homerange_ID	the number of GPS sites after filtering	arrival date1	departure date1	arrival date2	departure date2	migration stage	migration stage	Summary of GPS sites	Sample points after preprocessing
Swan Geese	Anser cygnoides	39022916	2019-01-08 11:44:00	2020-01-07 09:00:00	7699	7369	LL	3912	6734	0	1081	2019-12-06	2020-01-07	2019-02-12	2019-03-12	wintering period	breeding season	23487	1113
							LH	2892		1	1170	2019-06-27	2019-08-18			breeding season	stopover periods	12815	698
							HL	405×		2	2685	2019-04-12	2019-10-04			breeding season	wintering period	12364	542
							HH	159×		3	1046	2019-03-14	2019-04-07	2019-10-05	2019-12-05	stopover period(spring autumn)
							NC	1×		4	752	2019-03-29	2019-03-26	2019-10-06	2019-11-07	stopover period(spring autumn)
Swan Geese	Anser cygnoides	39067283	2019-02-12 15:46:00	2020-01-07 03:01:00	7480	6579	LL	4134	6091	0	1616	2019-11-04	2020-01-07	2019-02-12	2019-03-18	wintering period
							LH	2003		1	1126	2019-06-24	2019-08-14			breeding season
							HL	359×		2	2515	2019-04-03	2019-10-04			breeding season
							HH	82×		3	82	2019-03-29	2019-04-02			stopover period(spring)
							NC	1×		4	210	2019-11-02	2019-11-03	2019-03-19	2019-03-28	stopover period(autumn)
										5	542	2019-10-05	2019-11-02			stopover period(autumn)
Swan Geese	Anser cygnoides	39068505	2019-02-12 14:35:00	2020-01-07	4823	4268	LL	2124	3764	0	216	2019-03-30	2019-04-09			stopover period(spring)
							LH	1708		1	1839	2019-04-16	2019-09-12			breeding season
							HL	256×		2	282	2019-03-14	2019-03-27			stopover period(spring)
							HH	179×		3	311	2019-09-16	2019-10-20	2019-03-12	2019-03-13	stopover period(spring autumn)
							NC	1×		4	84	2019-10-20	2019-10-28			stopover period(autumn)
										5	1032	2019-10-28	2020-01-06	2019-02-12	2019-03-11	wintering period
Swan Geese	Anser cygnoides	39073075	2019-02-12 14:41:00	2020-01-07 11:00:00	7718	7312	LL	4290	6681	0	474	2019-06-17	2019-07-09			breeding season
							LH	2495		1	1877	2019-11-02	2020-01-07	2019-02-12	2019-03-10	wintering period
							HL	364×		2	1332	2019-06-16	2019-09-07			breeding season
							HH	162×		3	1416	2019-04-10	2019-06-15			stopover period(spring)
							NC	1×		4	659	2019-03-11	2019-04-08	2019-09-09	2019-09-16	stopover period(spring autumn)
										5	923	2019-09-17	2019-10-30			stopover period(autumn)
Swan Geese	Anser cygnoides	39073083	2019-01-08 11:44:00	2020-01-07 09:00:00	8322	7884	LL	4637	7113	0	1765	2019-01-10	2020-01-07			wintering period
							LH	2623		1	237	2019-03-21	2019-04-01			wintering period
							HL	507×		2	3414	2019-04-17	2019-09-23			breeding season
							HH	116×		3	226	2019-04-03	2019-04-14			stopover period(spring)
							NC	1×		4	280	2019-09-25	2019-10-08			stopover period(autumn)
										5	1191	2019-10-08	2019-12-05			stopover period(autumn)
Swan Geese	Anser cygnoides	39076136	2019-02-12 15:33:00	2020-01-07	7518	7009	LL	2275	6359	0	1662	2019-11-08	2020-01-06	2019-02-12	2019-03-17	wintering period
							LH	4136		1	1008	2019-06-12	2019-07-28			breeding season
							HL	464×		2	2022	2019-04-20	2019-09-15			breeding season
							HH	133×		3	118	2019-03-18	2019-03-23			stopover period(spring)
							NC	1×		4	94	2019-04-15	2019-04-19			stopover period(spring)
										5	370	2019-03-24	2019-04-12			stopover period(spring)
										6	174	2019-10-23	2019-11-07			stopover period(autumn)
										7	911	2019-09-16	2019-10-13			stopover period(autumn)
Swan Geese	Anser cygnoides	39154396	2019-02-12 14:49:00	2020-01-07 04:00:00	6910	6387	LL	4016	5715	0	2087	2019-06-12	2019-09-20			breeding season
							LH	1828		1	687	2019-05-05	2019-06-12			stopover period(spring)
							HL	433×		2	101	2019-04-28	2019-05-03			stopover period(spring)
							HH	109×		3	592	2019-09-24	2019-10-24			stopover period(autumn)
							NC	1×		4	636	2019-03-28	2019-04-26			stopover period(spring)
										5	1612	2019-10-25	2020-01-07	2019-02-27	2019-03-26	wintering period
Swan Geese	Anser cygnoides	39154719	2019-01-08 10:32:00	2020-01-07 02:00:00	7198	6754	LL	4032	6209	0	784	2019-10-11	2019-04-03			stopover period(spring autumn)
							LH	2274		1	128	2019-10-05	2019-10-11			stopover period(autumn)
							HL	116×		2	3815	2019-04-08	2019-10-04			breeding season
							HH	331×		3	1482	2019-10-29	2020-01-07			wintering period
							NC	1×
Total sites					57668	53562		49379	48666		48666
Note：× represents no longer participate in the following filter; low velocities and low turns (LL) interpreted as resting; low velocities and high turns (LH) as foraging; high velocities and low turns (HL) as traveling; high velocities and high turns (HH) as extensive search; not classified(NC) as the last point of migratory behavior

## Sheet: remotesensing-1598935-TableS2
Table S2. Environmental variables and relative data descriptions for the Maximum Entropy (MaxEnt) distribution model were used to simulate potential habitats of Swan Geese (Anser cygnoides) in this study.
Data	Data description	Time range(year)	Resolution	Data type	Data source
bio1	Annual mean temperature	1970-2000	30″	Raster dataset	Worldclim (www.worldclim.org)
bio 2	Mean diurnal range(Mean of monthly (max temp–min temp))
bio 3	Isothermality (bio2/bio7) (* 100)
bio 4	Temperature seasonality(standard deviation *100)
bio 5	Max temperature of warmest month
bio 6	Min temperature of coldest month
bio 7	Temperature annual range (bio5–bio6)
bio 8	Mean temperature of wettest quarter
bio 9	Mean temperature of driest quarter
bio 10	Mean temperature of warmest month
bio 11	Mean temperature of coldest month
bio 12	Annual precipitation
bio 13	Precipitation of wettest month
bio 14	Precipitation of driest month
bio 15	Precipitation seasonality (coefficient of variation)
bio 16	Precipitation of wettest quarter
bio 17	Precipitation of driest quarter
bio 18	Mean temperature of warmest quarter
bio 19	Mean temperature of coldest quarter
LULC	Land use and land cover	2020	30 m	Raster dataset	Globeland30 (www.globallandcover.com)
EL	Elevation	2010	250 m	Raster dataset	EarthEnv (www.earthenv.org)
Slope	Slope	2010	250 m	Raster dataset	EarthEnv (www.earthenv.org)
EVI	Enhanced Vegetation Index	Jan., Apr., Aug., and Oct. of 2020	1 km	Raster dataset	LAADS DAAC (https://ladsweb.modaps.eosdis.nasa.gov)
HFI	Human footprint index	2009	1 km	Raster dataset	Global terrestrial Human Footprint maps for 2009 (https://datadryad.org/stash/dataset/doi:10.5061/dryad.052q5)

## Sheet: remotesensing-1598935-TableS3
Table S3. Accuracy evaluation for training and testing samples of Swan Geese (Anser cygnoides) habitat in the Maximum Entropy (MaxEnt) distribution model.
Habitat types	Training samples	Training AUC	testing samples	testing AUC	StandardDeviation
Breeding grounds	752	0.9572	250	0.9568	0.0024
Stopover sites	306	0.9798	101	0.9779	0.0025
Wintering grounds	231	0.9887	77	0.9888	0.0011
